# Supplementary material
Source: PubMed Central journal article supplement (PMC3020908)
Supplement: NIHMS260815-supplement-FundusPhotos.pdf [file NIHMS260815-supplement-FundusPhotos.pdf]

(a) Patient #1

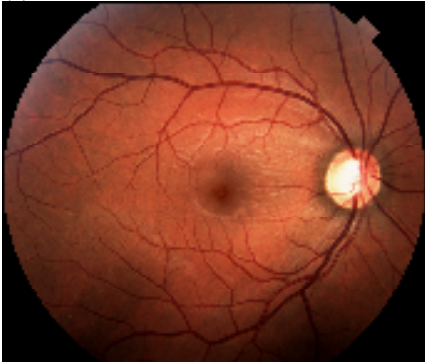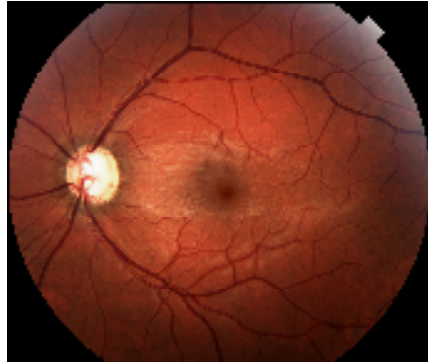

(b) Patient #2

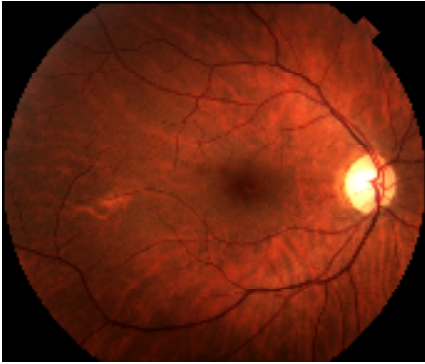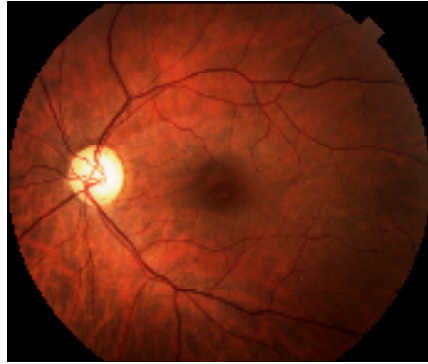

(c) Patient #3

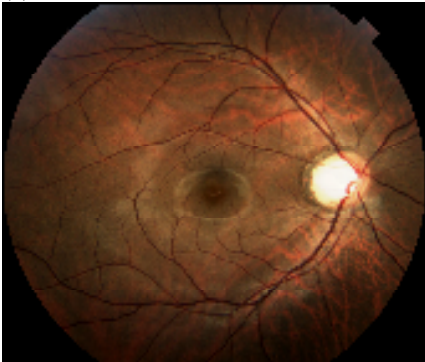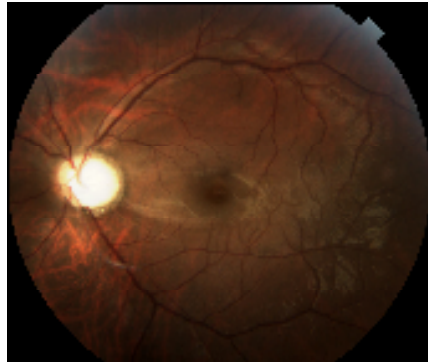

(d) Patient #4

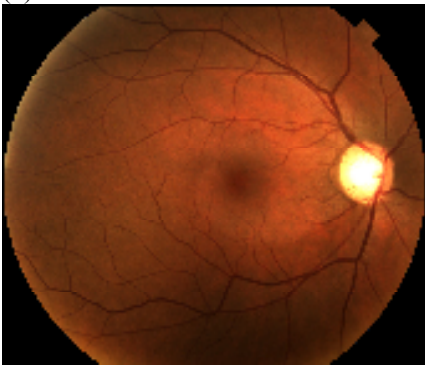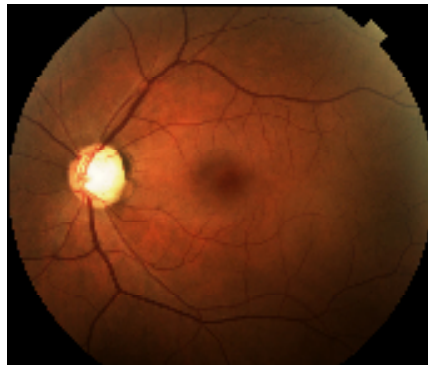

(e) Patient #5

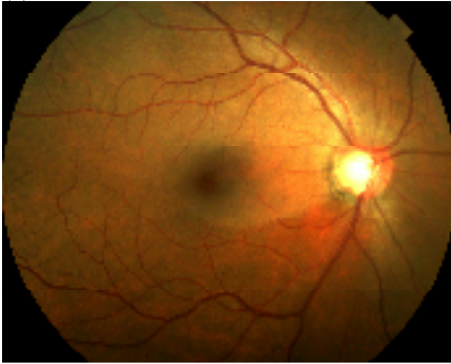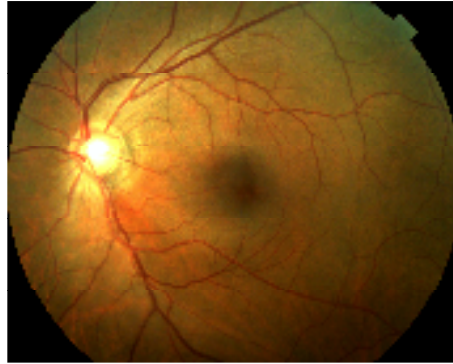

(f) Patient #6

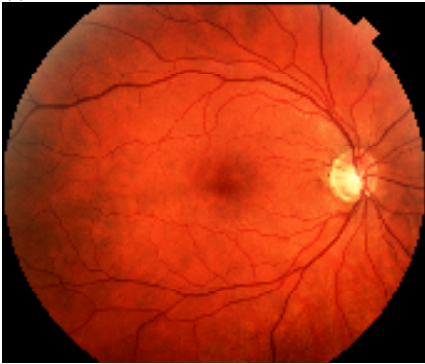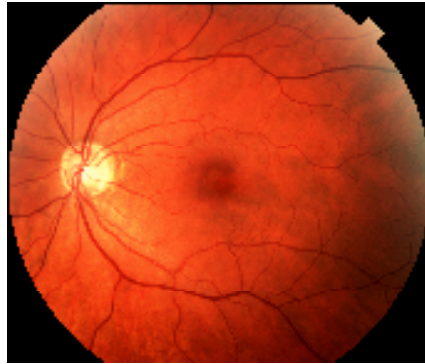

(g) Patient #7

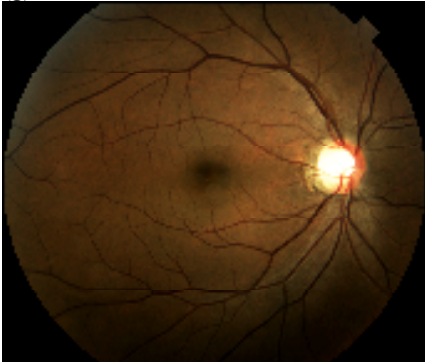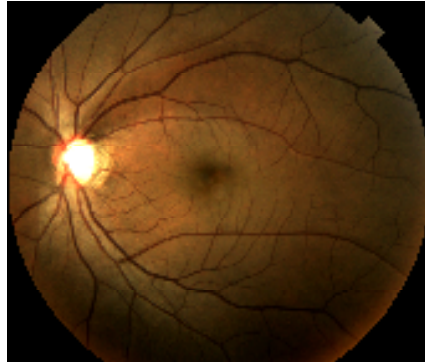

(h) Patient #8

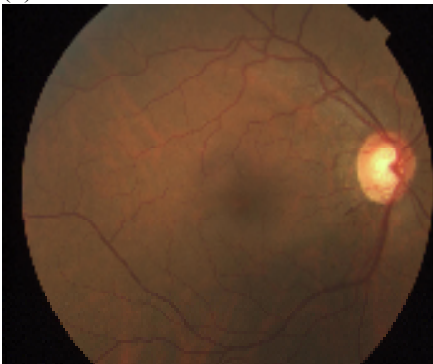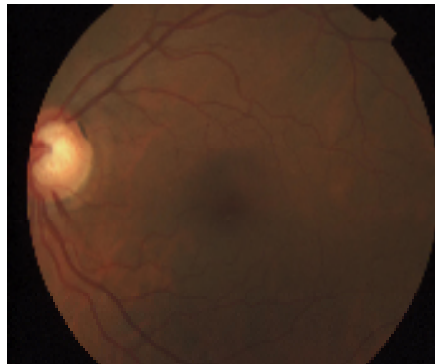

(i) Patient #9

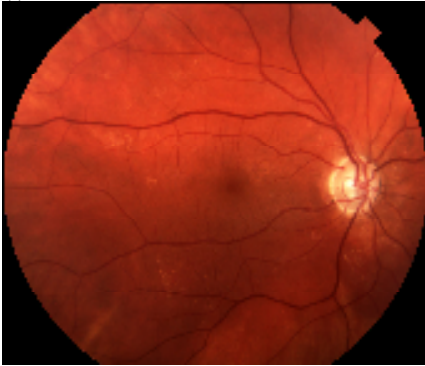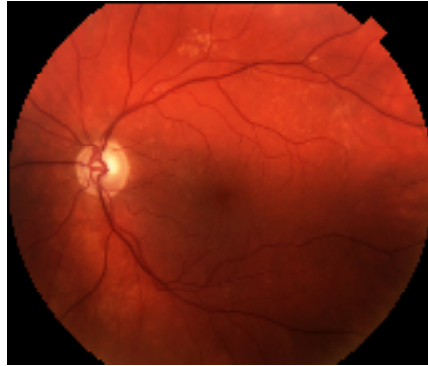

(j) Patient #10

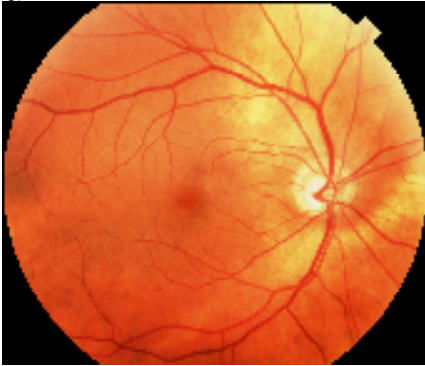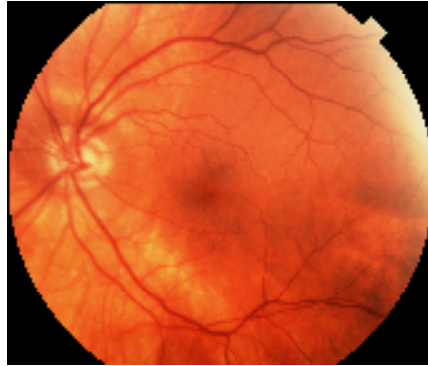

Supplement Figure 1: Fundus photographs of both eyes of our 10 glaucoma patients
